# Supplementary material
Source: HighWire-hosted journal article supplement (http://www.qdcxjkg.com/highwire/filestream/113552/field_highwire_adjunct_files/0/41-4_CME.pdf)
Supplement: 41-4_CME.pdf [file 41-4_CME.pdf]

# CME Credit Application Form

## (1 CME credit)

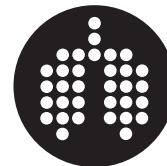

To receive CME credits, read the CME article in this issue, indicate the correct responses to the educational questions and complete the requested information. This form is also available in electronic format at [www.erj.ersjournals.com/current.dtl](http://www.erj.ersjournals.com/current.dtl). To return your application, you can either:

- use this form and return it completed to ERS Publications Office, 442 Glossop Road, Sheffield, S10 2PX, UK; fax to +44-114-2665064; or e-mail to [info@ersj.org.uk](mailto:info@ersj.org.uk)
- fill in the online form at [www.erj.ersjournals.com/current.dtl](http://www.erj.ersjournals.com/current.dtl)

Certificates will be e-mailed to the address filled in below. Please allow 4 weeks for processing.

**CME credit applications are now free of charge.**

### Applicant personal details.

ERS Membership No. (if known): ..... Date of Birth (DD/MM/YYYY): .....

Family Name: ..... First Name: .....

Mailing Address: .....

.....

Postal Code: ..... City: ..... Country: .....

Telephone: + ..... E-mail: .....

### Educational questions.

**"Correlation of radio- and histomorphological pattern of pulmonary adenocarcinoma"**

1. Which statement is not correct: The novel histologic IASLC/ATS/ERS classification for pulmonary adenocarcinomas:

- Classifies pulmonary adenocarcinomas based on the predominant histomorphological pattern.
- Has been demonstrated to be of high prognostic value.
- Is preferably applicable to biopsies.
- Is reliably applicable among experienced pathologists.
- Is intended to allow for standardized tumor grading.

2. Which of the following statements concerning the lepidic growth pattern of pulmonary adenocarcinomas is correct?

- Peripheral adenocarcinomas have a significantly lower percentage of lepidic growth pattern than central adenocarcinomas.
- Predominant lepidic growth of pulmonary adenocarcinomas indicates a poor prognosis.
- Lepidic predominant adenocarcinomas are significantly associated with a smooth tumor margin.
- Air bronchogram is negatively associated with the lepidic growth pattern.
- Ground glass opacity is considered the computed tomography correlate of lepidic growth.

3. Concerning the CT appearance of adenocarcinomas, which of the following statements is true?

- The shape of the nodule is highly predictive of histological growth pattern.
- Semi-solid adenocarcinomas are more frequent than non-solid ones.
- The solid appearance at CT correlates well with the solid growth pattern.
- Spiculated margins are predictive of the micropapillary growth pattern.
- The presence of intratumoral bronchogram is a significant prognostic parameter.

4. Concerning the CT appearance of adenocarcinomas, which of the following statements is not true?

- Smooth margins suggest a low grade adenocarcinoma with good prognosis.
- Ground glass opacity might not represent lepidic growth pattern.
- A precise assessment of CT morphological features is more important in the palliative than in the curative workup of adenocarcinomas.
- A precise assessment of CT morphological features may help plan percutaneous biopsy.
- A precise assessment of CT morphological features may help plan surgery.
